# Supplementary material for: circFL-seq reveals full-length circular RNAs with rolling circular reverse transcription and nanopore sequencing
Source: eLife. 2021 Oct 14;10:e69457. doi: 10.7554/eLife.69457 (PMC8550772; doi:10.7554/eLife.69457)
Supplement: Supplementary file 7. [file elife-69457-supp7.xlsx]

## Sheet: S4
Sequences of hybrid probes for rRNA degradation
Target	Name	Sequence (5'-3')
18S rRNA	18srRNA.R01	TTAATCATGGCCTCAGTTCCGAAAACCAACAAAATAGAACCGCGGTCCTATTCCATTATTCCTAGCTGCGGTATCCAGGC
18S rRNA	18srRNA.R02	GCTTTCGCTCTGGTCCGTCTTGCGCCGGTCCAAGAATTTCACCTCTAGCGGCGCAATACGAATGCCCCCGGCCGTCCCTC
18S rRNA	18srRNA.R03	TGGTCGGAACTACGACGGTATCTGATCGTCTTCGAACCTCCGACTTTCGTTCTTGATTAATGAAAACATTCTTGGCAAAT
18S rRNA	18srRNA.R04	TCCTCGTTCATGGGGAATAATTGCAATCCCCGATCCCCATCACGAATGGGGTTCAACGGGTTACCCGCGCCTGCCGGCGT
18S rRNA	18srRNA.R05	ATCGGTAGTAGCGACGGGCGGTGTGTACAAAGGGCAGGGACTTAATCAACGCAAGCTTATGACCCGCACTTACTGGGAAT
18S rRNA	18srRNA.R06	TTCGACCGTCTTCTCAGCGCTCCGCCAGGCCGTGGGCCGACCCCGGCGGGGCCGATCCGAGGGCCTCACTAAACCATCCA
18S rRNA	18srRNA.R07	GGGGGCTCGAGGACGGGCCCGGCGCCCCGCAAGCGAGGAGGACGACGGACGGACGG
18S rRNA	18srRNA.R08	TTTGAGACAAGCATATGCTACTGGCAGGATCAACCAGGTAGGTAGGTAGAGCGCGGCGAGGCCCCGACGCGGCCGGACGG
18S rRNA	18srRNA.R09	AAGGAACCATAACTGATTTAATGAGCCATTCGCAGTTTCACTGTACCGGCCGTGCGTACTTAGACATGCATGGCTTAATC
18S rRNA	18srRNA.R10	CGAAGGGGGTCAGCGCCCGTCGGCATGTATTAGCTCTAGAATTACCACAGTTATCCAAGTAGGAGAGGAGCGAGCGACCA
18S rRNA	18srRNA.R11	CCGCGGCCCGCCCCCCGGCCGGGGCCGGAGAGGGGCTGACCGGGTTGGTTTTGATCTGATAAATGCACGCATCCCCCCCG
18S rRNA	18srRNA.R12	TAGGGCAGACGTTCGAATGGGTCGTCGCCGCCACGGGGGGCGTGCGATCGGCCCGAGGTTATCTAGAGTCACCAAAGCCG
18S rRNA	18srRNA.R13	CTCCCTCTCCGGAATCGAACCCTGATTCCCCGTCACCCGTGGTCACCATGGTAGGCACGGCGACTACCATCGAAAGTTGA
18S rRNA	18srRNA.R14	TTCGTCACTACCTCCCCGGGTCGGGAGTGGGTAATTTGCGCGCCTGCTGCCTTCCTTGGATGTGGTAGCCGTTTCTCAGG
18S rRNA	18srRNA.R15	CTCCAATGGATCCTCGTTAAAGGATTTAAAGTGGACTCATTCCAATTACAGGGCCTCGAAAGAGTCCTGTATTGTTATTT
18S rRNA	18srRNA.R16	CTACGAGCTTTTTAACTGCAGCAACTTTAATATACGCTATTGGAGCTGGAATTACCGCGGCTGCTGGCACCAGACTTGCC
18S rRNA	18srRNA.R17	AGGGGGCGCCGAGAGGCAAGGGGCGGGGACGGGCGGTGGCTCGCCTCGCGGCGGACCGCCCGCCCGCTCCCAAGATCCAA
18S rRNA	18srRNA.R18	GGCTCGGGCCTGCTTTGAACACTCTAATTTTTTCAAAGTAAACGCTTCGGGCCCCGCGGGACACTCAGCTAAGAGCATCG
18S rRNA	18srRNA.R19	ACCCAAAGACTTTGGTTTCCCGGAAGCTGCCCGGCGGGTCATGGGAATAACGCCGCCGCATCGCCGGTCGGCATCGTTTA
18S rRNA	18srRNA.R20	TAAGCCGCAGGCTCCACTCCTGGTGGTGCCCTTCCGTCAATTCCTTTAAGTTTCAGCTTTGCAACCATACTCCCCCCGGA
18S rRNA	18srRNA.R21	CACGGAATCGAGAAAGAGCTATCAATCTGTCAATCCTGTCCGTGTCCGGGCCGGGTGAGGTTTCCCGTGTTGAGTCAAAT
18S rRNA	18srRNA.R22	AGCATGCCAGAGTCTCGTTCGTTATCGGAATTAACCAGACAAATCGCTCCACCAACTAAGAACGGCCATGCACCACCACC
18S rRNA	18srRNA.R23	TCAATCTCGGGTGGCTGAACGCCACTTGTCCCTCTAAGAAGTTGGGGGACGCCGACCGCTCGGGGGTCGCGTAACTAGTT
18S rRNA	18srRNA.R24	AGGGTAGGCACACGCTGAGCCAGTCAGTGTAGCGCGCGTGCAGCCCCGGACATCTAAGGGCATCACAGACCTGTTATTGC
18S rRNA	18srRNA.R25	TAATGATCCTTCCGCAGGTTCACCTACGGAAACCTTGTTACGACTTTTACTTCCTCTAGATAGTCAAG
28S rRNA	28srRNA.R01	GGAATCCTGGTTAGTTTCTTTTCCTCCGCTGACTAATATGCTTAAATTCAGCGGGTCGCCACGTCTGATCTGAGGTCGCG
28S rRNA	28srRNA.R02	TTCCGTACGCCACATGTCCCGCGCCCCGCGGGGCGGGGATTCGGCGCTGGGCTCTTCCCTGTTCACTCGCCGTTACTGAG
28S rRNA	28srRNA.R03	TACCGGCCTCACACCGTCCACGGGCTGGGCCTCGATCAGAAGGACTTGGGCCCCCCACGAGCGGCGCCGGGGAGCGGGTC
28S rRNA	28srRNA.R04	TTAGATGGAGTTTACCACCCGCTTTGGGCTGCATTCCCAAGCAACCCGACTCCGGGAAGACCCGGGCGCGCGCCGGCCGC
28S rRNA	28srRNA.R05	CTTGAACTCTCTCTTCAAAGTTCTTTTCAACTTTCCCTTACGGTACTTGTTGACTATCGGTCTCGTGCCGGTATTTAGCC
28S rRNA	28srRNA.R06	GCCGGACCCGCCGCCGGGTTGAATCCTCCGGGCGGACTGCGCGGACCCCACCCGTTTACCTCTTAACGGTTTCACGCCCT
28S rRNA	28srRNA.R07	GGGGCGGCGGGGGAAGGGAGGGCGGGTGGAGGGGTCGGGAGGAACGGGGGGCGGGAAAGATCCGCCGGGCCGCCGACACG
28S rRNA	28srRNA.R08	TCCCCCGCCGACCCCACCCCCGGCCCCGCCCGCCCACCCCCGCACCCGCCGGAGCCCGCCCCCTCCGGGGAGGAGGAGGA
28S rRNA	28srRNA.R09	TCCCAGCCGTCCCGGAGCCGGTCGCGGCGCACCGCCTGGAAATGCGCCCGGCGGCGGCCGGTCGCCGGTCCGGGGGACGG
28S rRNA	28srRNA.R10	GGGGCCGGGGGGCGGAGACGGGGGAGGAGGAGGACGGACGGACGGACGGGGCCCCCCGAGCCACCTTCCCCGCCGGGCCT
28S rRNA	28srRNA.R11	CGGTCCCGCCGCCCCCGCCGCCGCCGCCACCGCCGCCGCCGCCGCCGCCCCGACCCGCGCGCCCTCCCGAGGGAGGACGC
28S rRNA	28srRNA.R12	CGGCGACGGGTCTCGCTCCCTCGGCCCCGGGATTCGGCGAGTGCTGCTGCCGGGGGGGCTGTAACACTCGGGGGGGGTTT
28S rRNA	28srRNA.R13	AGGAGACGCCGGCGCCGCGCCGGGGGAGACCCCCCTCGCGGGGATTCCCGCGGGGGTGGGCGCCGGGAGGGGGGAGAGCG
28S rRNA	28srRNA.R14	CCCGTCGCCGGGGCGGGGGCGCGGGGAGGAGGGGTGGGAGAGCGGTCGCGCCGTGGGAGGGGTGGCCCGGCCCCCCCACG
28S rRNA	28srRNA.R15	CCCCGGGCCCGACGGCGCGACCCGCCCGGGGCGCACTGGGGACAGTCCGCCCCGCCCCCCGACCCGCGCGCGGCACCCCC
28S rRNA	28srRNA.R16	CCGACGTCGCCGCCGACCCCGTGCGCTCGCTCCGCCGTCCCCCTCTTCGGGGGACGCGCGCGTGGCCCCGAGAGAACCTC
28S rRNA	28srRNA.R17	CGGCGGCTTTCGTGCGAGCCCCCGACTCGCGCACGTGTTAGACTCCTTGGTCCGTGTTTCAAGACGGGTCGGGTGGGTAG
28S rRNA	28srRNA.R18	GGTGCCCCTCGGCGGACTGGAGAGGCCTCGGGATCCCACCTCGGCCGGCGAGCGCGCCGGCCTTCACCTTCATTGCGCCA
28S rRNA	28srRNA.R19	GGCATAGTTCACCATCTTTCGGGTCCTAACACGTGCGCTCGTGCTCCACCTCCCCGGCGCGGCGGGCGAGACGGGCCGGT
28S rRNA	28srRNA.R20	TACCCAGGTCGGACGACCGATTTGCACGTCAGGACCGCTACGGACCTCCACCAGAGTTTCCTCTGGCTTCGCCCTGCCCA
28S rRNA	28srRNA.R21	TCTGCGAGAGCGCCAGCTATCCTGAGGGAAACTTCGGAGGGAACCAGCTACTAGATGGTTCGATTAGTCTTTCGCCCCTA
28S rRNA	28srRNA.R22	ATAGGTTGAGATCGTTTCGGCCCCAAGACCTCTAATCATTCGCTTTACCGGATAAAACTGCGTGGCGGGGGTGCGTCGGG
28S rRNA	28srRNA.R23	AAAGTGGCCCACTAGGCACTCGCATTCCACCCCGGCTCCACGCCAGCGAGCCGGGCTTCTTACCCATTTAAAGTTTGAGA
28S rRNA	28srRNA.R24	TTCTGGGGTCTGATGAGCGTCGGCATCGGGCGCCTTAACCCGGCGTTCGGTTCATCCCGCAGCGCCAGTTCTGCTTACCA
28S rRNA	28srRNA.R25	GCAGGTGAGTTGTTACACACTCCTTAGCGGATTCCGACTTCCATGGCCACCGTCCTGCTGTCTATATCAACCAACACCTT
28S rRNA	28srRNA.R26	CGTCCACTCTCGACTGCCGGCGACGGCCGGGTATGGGCCCGACGCTCCAGCGCCATCCATTTTCAGGGCTAGTTGATTCG
28S rRNA	28srRNA.R27	CCCACACCCCCGCCGCCGCCGCCGCCGCCGCCCTCCGACGCACACCACACGCGCGCGCGCGCCGCCGCCCCCGCCGCTCC
28S rRNA	28srRNA.R28	TCCGCGGGGCTCCGGGGGCGGGGAGCGGGGCGTGGGCGGGAGGAGGGGAGGAGGCGTGGGGGGGGGGGCGGGGGAAGGAC
28S rRNA	28srRNA.R29	CCTGCGGCGGCCTCCACCCGGGCCCGCGCCCTAGGCTTCAAGGCTCACCGCAGCGGCCCTCCTACTCGTCGCGGCGTAGC
28S rRNA	28srRNA.R30	TGCTGTTCACATGGAACCCTTCTCCACTTCGGCCTTCAAAGTTCTCGTTTGAATATTTGCTACTACCACCAAGATCTGCA
28S rRNA	28srRNA.R31	CCGAGGGCAACGGAGGCCATCGCCCGTCCCTTCGGAACGGCGCTCGCCCATCTCTCAGGACCGACTGACCCATGTTCAAC
28S rRNA	28srRNA.R32	GTTACCGCACTGGACGCCTCGCGGCGCCCATCTCCGCCACTCCGGATTCGGGGATCTGAACCCGACTCCCTTTCGATCGG
28S rRNA	28srRNA.R33	CCATTCCAGGGCGCCCTGCCCTTCACAAAGAAAAGAGAACTCTCCCCGGGGCTCCCGCCGGCTTCTCCGGGATCGGTCGC
28S rRNA	28srRNA.R34	TCAAGGGCCAGCGAGAGCTCACCGGACGCCGCCGGAACCGCGACGCTTTCCAAGGCACGGGCCCCTCTCTCGGGGCGAAC
28S rRNA	28srRNA.R35	CCAGAGGCTGTTCACCTTGGAGACCTGCTGCGGATATGGGTACGGCCCGGCGCGAGATTTACACCCTCTCCCCCGGATTT
28S rRNA	28srRNA.R36	CCCAGCCCTTAGAGCCAATCCTTATCCCGAAGTTACGGATCCGGCTTGCCGACTTCCCTTACCTACATTGTTCCAACATG
28S rRNA	28srRNA.R37	TGCCCCGGGCGTGGGGGGGGCGCGCGCCTCGTCCAGCCGCGGCGCGCGCCCAGCCCCGCTTCGCGCCCCAGCCCGACCGA
28S rRNA	28srRNA.R38	AGAGAGAGAGAGAGAGGGCGCGGGGTGGGGAGGGAGCGAGCGGCGCGCGCGGGTGGGGCGGGGGAGGGCCGCGAGGGGGG
28S rRNA	28srRNA.R39	CCTGCCGCCCCGACCCTTCTCCCCCCGCCGCGCCCCCACGCGGCGCTCCCCCGGGGAGGGGGGAGGACGGGGAGCGGGGG
28S rRNA	28srRNA.R40	GCCGCCGGCCCCCCGGGTCCCCGGGGCCCCCCTCGCGGGGACCTGCCCCCGCCGGCCGCCCCGGCGGCCGCCGCGCGGCC
28S rRNA	28srRNA.R41	CTCCCCGGGGGCGGCCGCGACGCCCGCCGCAGCTGGGGCGATCCACGGGAAGGGCCCGGCTCGCGTCCAGAGTCCGCGCC
28S rRNA	28srRNA.R42	CGACCGCTCCCGCCCCCAGCGGACGCGCGCGCGACCGAGACGTGGGGTGGGGGTGGGGGGCGCGCCGCGCCGCCGCCGGG
28S rRNA	28srRNA.R43	GAACGGGGGGCGGACGGGGCCGGGGGGGTAGGGCGGGGGGACGAACCGCCCCGCCCCGCCGCCCGCCGACCGCCGCCGCC
28S rRNA	28srRNA.R44	GGCGGACCCGGCGGGGGGGACCGGCCCGCGGCCCCTCCGCCGCCTGCCGCCGCCGCCGCCGCGCGCCGAGGAGGAGGGGG
28S rRNA	28srRNA.R45	ATTCCCCTGGTCCGCACCAGTTCTAAGTCGGCTGCTAGGCGCCGGCCGAGGCGAGGCGCGCGCGGAACCGCGGCCCCGGG
28S rRNA	28srRNA.R46	TCAGAGCACTGGGCAGAAATCACATCGCGTCAACACCCGCCGCGGGCCTTCGCGATGCTTTGTTTTAATTAAACAGTCGG
28S rRNA	28srRNA.R47	GAGGCATTTGGCTACCTTAAGAGAGTCATAGTTACTCCCGCCGTTTACCCGCGCTTCATTGAATTTCTTCACTTTGACAT
28S rRNA	28srRNA.R48	TGGCTGTGGTTTCGCTGGATAGTAGGTAGGGACAGTGGGAATCTCGTTCATCCATTCATGCGCGTCACTAATTAGATGAC
28S rRNA	28srRNA.R49	CATGTCTCTTCACCGTGCCAGACTAGAGTCAAGCTCAACAGGGTCTTCTTTCCCCGCTGATTCCGCCAAGCCCGTTCCCT
28S rRNA	28srRNA.R50	CAGGGCCGCGGACCCCGCCCCGGGCCCCTCGCGGGGACACCGGGGGGGCGCCGGGGGCCTCCCACTTATTCTACACCTCT
28S rRNA	28srRNA.R51	AGAGCCCCTCGGGCTCGCCCCCCCGCCTCACCGGGTCAGTGAAAAAACGATCAGAGTAGTGGTATTTCACCGGCGGCCCG
28S rRNA	28srRNA.R52	CGCCCCAGTCAAACTCCCCACCTGGCACTGTCCCCGGAGCGGGTCGCGCCCGGCCGGGCGGGCGCTTGGCGCCAGAAGCG
28S rRNA	28srRNA.R53	TTGCCCTTCTGCTCCACGGGAGGTTTCTGTCCTCCCTGAGCTCGCCTTAGGACACCTGCGTTACCGTTTGACAGGTGTAC
28S rRNA	28srRNA.R54	AAACCCAAAAGGTCAGAAGGATCGTGAGGCCCCGCTTTCACGGTCTGTATTCGTACTGAAAATCAAGATCAAGCGAGCTT
28S rRNA	28srRNA.R55	CAAAAAGCGACGTCGCTATGAACGCTTGGCCGCCACAAGCCAGTTATCCCTGTGGTAACTTTTCTGACACCTCCTGCTTA
28S rRNA	28srRNA.R56	CGTTCCCTATTAGTGGGTGAACAATCCAACGCTTGGCGAATTCTGCTTCACAATGATAGGAAGAGCCGACATCGAAGGAT
28S rRNA	28srRNA.R57	CTGAGCAGGATTACCATGGCAACAACACATCATCAGTAGGGTAAAACTAACCTGTCTCACGACGGTCTAAACCCAGCTCA
28S rRNA	28srRNA.R58	CCCACAGATGGTAGCTTCGCCCCATTGGCTCCTCAGCCAAGCACATACACCAAATGTCTGAACCTGCGGTTCCTCTCGTA
28S rRNA	28srRNA.R59	CCGAGGCCAACCGAGGCTCCGCGGCGCTGCCGTATCGTTCGCCTGGGCGGGATTCTGACTTAGAGGCGTTCAGTCATAAT
28S rRNA	28srRNA.R60	GCGGGGCACGCGCCCTCCCGCGGCGGGGCGCGTGGAGGGGGGGGCGGCCCGCCGGCGGGGACAGGCGGGGGACCGGCTAT
28S rRNA	28srRNA.R61	AGGGGGCGGCCGCCTTTCCGGCCGCGCCCCGTTTCCCAGGACGAAGGGCACTCCGCACCGGACCCCGGTCCCGGCGCGCG
28S rRNA	28srRNA.R62	CGAAACCCCGACCCAGAAGCAGGTCGTCTACGAATGGTTTAGCGCCAGGTTCCCCACGAACGTGCGGTGCGTGACGGGCG
28S rRNA	28srRNA.R63	GACAAACCCTTGTGTCGAGGGCTGACTTTCAATAGATCGCAGCGAGGGAGCTGCTCTGCTACGTA
ETS rRNA	ets_0_420	CGAACGTCCGCCCCTCGCCCGTCGCGGCTCGGACCCGGCCCGGGAGAGCACGACGTCACCACATCGATCACGAAGAGCCC
ETS rRNA	ets_1_500	CACGCACCGCCGGCGGGCGGGGAGAGGAGAGACGAGGGGACCCCCGCGGGGCGGAGCGAGAAGGACGGTCCCGTTCGCCA
ETS rRNA	ets_2_580	CGCCGGCCCGCACCCGCGACGCAGAAGGCGGCGGGCGGGACGGCGAGGTCGGGCCGGGGTCCGCACCCCACGCCTTCCCA
ETS rRNA	ets_3_660	ACCGCCGCGGAGGGGGGCCGCCCGCAAGTCGACAACCACTGGAGGCGACAGCGAGGGCTGTCTGCCGCGTCAGAGGACCC
ETS rRNA	ets_4_740	CCGCAAGGGCCCAGGCGGAGCCGACGCTCGCGCAAACCCCCCGAGAGGGCAGCACGACGGGCCGGCGGGACGGCACCCCC
ETS rRNA	ets_5_820	AGGGGGCGCCGGGGGCGGGAACGACACACCACCGTTCGGCCTCGGGCACCTGAGGGACAACCCGGAGCGCTCCAGGAGCA
ETS rRNA	ets_6_900	TCTCACTCAAACCGCCTCGAACCCCACACCGACGAGCTCCCTCAGGACCCACGCGCGGACACCGCGGCGGCGACCGGAGG
ETS rRNA	ets_7_980	CCAGAGGGGAGCACGGGACGTGCGCTCACCGAGAGCAGGCGGGCGCCCTTCCCCGCGTGGGAGGGGCGCGTCTCGTCTCG
ETS rRNA	ets_8_1060	AGCCCCTCGGCGGCCGGCCGGCGCACGCGTCACACCGGCCCGAACCCACCGCGATCGCTCACACGGCCCGCGCGCACCCG
ETS rRNA	ets_9_1140	CCCGTCCACCCACCTCCTTCCTTCCGAGGCAGAGCGCCTCCGAAGTCAACCCACACACGACCGGTCGGAGGCAGAACGGC
ETS rRNA	ets_10_1220	TGCGCGCGGCCACCTCGAGCGTTCGCGTTCAGGGCGGGGGCCCGGCCGGTGCGCGCGTGCGCGCAACCCCACCAGGCCCC
ETS rRNA	ets_11_1300	CAGCCGCTCCTCCTCGGGCCCGCAGAGGCGCCGAGGGACGCCTGGGGAAGGGAGGGGGCCCTGCGGTACGAGGAAACACC
ETS rRNA	ets_12_1380	CCGGTACCCCCAAGGCACGCCTCTCAGATCGCTAGAGAAGGCTTTTCTCACCGAGGGTGGGTCACACTCCCCCCACCCGC
ETS rRNA	ets_13_1460	GAGGAGGGTCCTCTGCGAGCGGGTCGCTACGGCAGCGCTACCATAACGGAGGCAGAGACAGAGGCGGCGGCCCGGGGGAT
ETS rRNA	ets_14_1540	CGACGAGCCGCACTCGGCCACCACCGCGGTGGCCGGCGGAACCCTCGCTTCTCCCCCCCAACCCCGTCGAGGGGGAAGCG
ETS rRNA	ets_15_1620	TCCCAACCCGCTGGGACGCCGGGCCCGGCCCGGCGGGATCCTCCCCCGACTCGGAAGGGGGAGGCGCGGGCCACAGTAGG
ETS rRNA	ets_16_1700	GAGAGCCGACTCGCGGCGGAGGGAGTCACGCGCCGGACAGAGCGCCGGGCGCGCACACCCACCGCCCGCCGGCCGCCGCG
ETS rRNA	ets_17_1780	CCCAGGGCCAGGCGGGCCCGACCCCGTGCCACGCAAACGCGGTCGTCGGCACCGGTCACGACTCGGCACGGGAGCGGGCG
ETS rRNA	ets_18_1860	ACCGTCGCTCGTGATTCTCGTCCATCCTCCGACCCGGTCCCGCTCCGGGAGACCGGCGCGCCCCCACCGTGGGACGCTTT
ETS rRNA	ets_19_1940	AGAACCGCCTCGCGAGCCCCGGGGCCCCGCCACCGGGGGCCCCGGAGCGACCGCAGCCACGAACCCGACACGCCACCACC
ETS rRNA	ets_20_2020	GCGGGATCCCACCGCCACAGACACGAGGGCGGTCCCGCGGCGCCCCGCCTGGGACGCCGGACGGCCCTCGGCCCCCACCG
ETS rRNA	ets_21_2100	CAAGGGCACCCGGGAGCCCGCAGAGGCGGCGGCTCGGGGAGAAACCTCAGGCACGGCCGGGCCACCAGGAAAACACGGCC
ETS rRNA	ets_22_2180	CGCTCGGGGGGAAGAAGAGGATCGGCGGGCGGCGGGCGGGGAAGAGGGCACAGACGGGCGAGGGCCGGGGACCGCGAGGG
ITS1 rRNA	its1_0_5528	TCGCGGTGGGGGGGTGGGTGTGCGGAGGGAAGCGCGCGGCGGCGGCGGCGCCGCCGCGGGCCTCGCCCTCCGGGCTCCGT
ITS1 rRNA	its1_1_5608	CGCGGCCGGCGGGGCCGGGCGGCGAACGAACGAGCGAGCGAACGAACGGGCACGCGGGCCCCGCCCGCGCACGCGCCGCG
ITS1 rRNA	its1_2_5688	GCACACCAACGACACGCCCTTCTTTCTCTCTCTCTCTCTCTCTCTCTCCCCCCCGTCTCCCTCCCGAGTTCTCCGGCTCT
ITS1 rRNA	its1_3_5768	CCCCCGCGCCCGCCGACACCCACGTCGTCGGGGCCGCGGCCGGGGACCGCTCCCCGCCGCCCGCCGGCCCCACGACACGC
ITS1 rRNA	its1_4_5848	GGCGGGGCCGGACGACGGGCCCCGGCGGGGAGGAGGGCACCGAGACCCCCCCAGACCCGCCGCGACGCCGCCGAGAACCG
ITS1 rRNA	its1_5_5928	GTGCCCGGCGGCGCGGAGCGGCGCGGCGGAGGCGACGGGAATCCGGCCGGCCCCGAAGACGGGGAGCCGGCGC
ITS2 rRNA	its2_0_6761	CCCCCGGCGGGCCCTGCGAGGGAACCCCCAGCCGCGCACCCCGAGGAGCCCGGAGGCACCCCCGGGGGCGATTGATCGGC
ITS2 rRNA	its2_1_6841	GCGGGGGGAGGGGGAAGGGGCGGGCGCGGCGGCAAGGGGAGGGCGGACGCCGCCGGGTCTGCGCTTAGGGGGACGGAGGG
ITS2 rRNA	its2_2_6921	GGCGCCGCCCTCCCCGTCTCTCTCAGCCGGGCGCGCCCCCCTCTCCCCCCCGCCACCCGACGCGTGACCACGCAGGGCCC
ITS2 rRNA	its2_3_7001	ACCCGGACCGCAGGCGGCGGCCACGGGAACTCGGCCCGAGCCGGCTCTCTCTTTCCCTCTCCGTCTTCGCGGGCGGCGGC
ITS2 rRNA	its2_4_7081	CGGGACCTTCCACCCGGCCGGGGCCGACGAACCCCGAACCCCGAGCCGCGCGCGGCGCGAGGGAGCCCCCCGAGGGAGGA
ITS2 rRNA	its2_5_7161	TTCCTCCTCCCCCACCACCACACCGCACGCAACACGCCCCCACCGCCGACGACGCGCGACGACGACGACGACGACGGGCA
ITS2 rRNA	its2_6_7241	CGGGCGGCGAACCGCGGCGACCGGGACGCGCTCCCCCGACCCTCTCTCCCCGCCGGCACCCTTCCCCTTCCGGACCCGCC
12S rRNA	RNR1.r1	GTTCGTCCAAGTGCACTTTCCAGTACACTTACCATGTTACGACTTGTCTCCTCTATATAAATGCGTAGGGGTTTTAGTTA
12S rRNA	RNR1.r2	AATGTCCTTTGAAGTATACTTGAGGAGGGTGACGGGCGGTGTGTACGCGCTTCAGGGCCCTGTTCAACTAAGCACTCTAC
12S rRNA	RNR1.r3	TCTTAGTTTACTGCTAAATCCACCTTCGACCCTTAAGTTTCATAAGGGCTATCGTAGTTTTCTGGGGTAGAAAATGTAGC
12S rRNA	RNR1.r4	CCATTTCTTGCCACCTCATGGGCTACACCTTGACCTAACGTCTTTACGTGGGTACTTGCGCTTACTTTGTAGCCTTCATC
12S rRNA	RNR1.r5	AGGGTTTGCTGAAGATGGCGGTATATAGGCTGAGCAAGAGGTGGTGAGGTTGATCGGGGTTTATCGATTACAGAACAGGC
12S rRNA	RNR1.r6	TCCTCTAGAGGGATATGAAGCACCGCCAGGTCCTTTGAGTTTTAAGCTGTGGCTCGTAGTGTTCTGGCGAGCAGTTTTGT
12S rRNA	RNR1.r7	TGATTTAACTGTTGAGGTTTAGGGCTAAGCATAGTGGGGTATCTAATCCCAGTTTGGGTCTTAGCTATTGTGTGTTCAGA
12S rRNA	RNR1.r8	TATGTTAAAGCCACTTTCGTAGTCTATTTTGTGTCAACTGGAGTTTTTTACAACTCAGGTGAGTTTTAGCTTTATTGGGG
12S rRNA	RNR1.r9	AGGGGGTGATCTAAAACACTCTTTACGCCGGCTTCTATTGACTTGGGTTAATCGTGTGACCGCGGTGGCTGGCACGAAAT
12S rRNA	RNR1.r10	TGACCAACCCTGGGGTTAGTATAGCTTAGTTAAACTTTCGTTTATTGCTAAAGGTTAATCACTGCTGTTTCCCGTGGGGG
12S rRNA	RNR1.r11	TGTGGCTAGGCTAAGCGTTTTGAGCTGCATTGCTGCGTGCTTGATGCTTGTTCCTTTTGATCGTGGTGATTTAGAGGGTG
12S rRNA	RNR1.r12	AACTCACTGGAACGGGGATGCTTGCATGTGTAATCTTACTAAGAGCTAATAGAAAGGCTAGGACCAAACCTATT
16S rRNA	RNR2.r1	AAACCCTGTTCTTGGGTGGGTGTGGGTATAATACTAAGTTGAGATGATATCATTTACGGGGGAAGGCGCTTTGTGAAGTA
16S rRNA	RNR2.r2	GGCCTTATTTCTCTTGTCCTTTCGTACAGGGAGGAATTTGAANGTAGATAGAAACCGACCTGGATTACTCCGGTCTGAAC
16S rRNA	RNR2.r3	TCAGATCACGTAGGACTTTAATCGTTGAACAAACGAACCTTTAATAGCGGCTGCACCATCGGGATGTCCTGATCCAACAT
16S rRNA	RNR2.r4	CGAGGTCGTAAACCCTATTGTTGATATGGACTCTAGAATAGGATTGCGCTGTTATCCCTAGGGTAACTTGTTCCGTTGGT
16S rRNA	RNR2.r5	CAAGTTATTGGATCAATTGAGTATAGTAGTTCGCTTTGACTGGTGAAGTCTTAGCATGTACTGCTCGGAGGTTGGGTTCT
16S rRNA	RNR2.r6	GCTCCGAGGTCGCCCCAACCGAAATTTTTAATGCAGGTTTGGTAGTTTAGGACCTGTGGGTTTGTTAGGTACTGTTTGCA
16S rRNA	RNR2.r7	TTAATAAATTAAAGCTCCATAGGGTCTTCTCGTCTTGCTGTGTTATGCCCGCCTCTTCACGGGCAGGTCAATTTCACTGG
16S rRNA	RNR2.r8	TTAAAAGTAAGAGACAGCTGAACCCTCGTGGAGCCATTCATACAGGTCCCTATTTAAGGAACAAGTGATTATGCTACCTT
16S rRNA	RNR2.r9	TGCACGGTTAGGGTACCGCGGCCGTTAAACATGTGTCACTGGGCAGGCGGTGCCTCTAATACTGGTGATGCTAGAGGTGA
16S rRNA	RNR2.r10	TGTTTTTGGTAAACAGGCGGGGTAAGATTTGCCGAGTTCCTTTTACTTTTTTTAACCTTTCCTTATGAGCATGCCTGTGT
16S rRNA	RNR2.r11	TGGGTTGACAGTGAGGGTAATAATGACTTGTTGGTTGATTGTAGATATTGGGCTGTTAATTGTCAGTTCAGTGTTTTAAT
16S rRNA	RNR2.r12	CTGACGCAGGCTTATGCGGAGGAGAATGTTTTCATGTTACTTATACTAACATTAGTTCTTCTATAGGGTGATAGATTGGT
16S rRNA	RNR2.r13	CCAATTGGGTGTGAGGAGTTCAGTTATATGTTTGGGATTTTTTAGGTAGTGGGTGTTGAGCTTGAACGCTTTCTTAATTG
16S rRNA	RNR2.r14	GTGGCTGCTTTTAGGCCTACTATGGGTGTTAAATTTTTTACTCTCTCTACAAGGTTTTTTCCTAGTGTCCAAAGAGCTGT
16S rRNA	RNR2.r15	TCCTCTTTGGACTAACAGTTAAATTTACAAGGGGATTTAGAGGGTTCTGTGGGCAAATTTAAAGTTGAACTAAGATTCTA
16S rRNA	RNR2.r16	TCTTGGACAACCAGCTATCACCAGGCTCGGTAGGTTTGTCGCCTCTACCTATAAATCTTCCCACTATTTTGCTACATAGA
16S rRNA	RNR2.r17	CGGGTGTGCTCTTTTAGCTGTTCTTAGGTAGCTCGTCTGGTTTCGGGGGTCTTAGCTTTGGCTCTCCTTGCAAAGTTATT
16S rRNA	RNR2.r18	TCTAGTTAATTCATTATGCAGAAGGTATAGGGGTTAGTCCTTGCTATATTATGCTTGGTTATAATTTTTCATCTTTCCCT
16S rRNA	RNR2.r19	TGCGGTACTATATCTATTGCGCCAGGTTTCAATTTCTATCGCCTATACTTTATTTGGGTAAATGGTTTGGCTAAGGTTGT
16S rRNA	RNR2.r20	CTGGTAGTAAGGTGGAGTGGGTTTGGGGCTAGGTTTAGC
5.8S rRNA	5_8srRNA.r1	CCTGCAATTCACATTAATTCTCGCAGCTAGCTGCGTTCTTCATCGACGCACGAGCCGAGTGATCCACCGCTAAGAGTC
5.8S rRNA	5_8srRNA.r2	AAGCGACGCTCAGACAGGCGTAGCCCCGGGAGGAACCCGGGGCCGCAAGTGCGTTCGAAGTGTCGATGATCAATGTGT
5s rRNA	5srRNA.R01	CCTGCTTAGCTTCCGAGATCAGACGAGATCGGGCGCGTTCAGGGTGGTATGGCCGTAGAC
5s rRNA	5srRNA.R02	AAAGCCTACAGCACCCGGTATTCCCAGGCGGTCTCCCATCCAAGTACTAACCAGGCCCGA
