# Supplementary material for: circFL-seq reveals full-length circular RNAs with rolling circular reverse transcription and nanopore sequencing
Source: eLife. 2021 Oct 14;10:e69457. doi: 10.7554/eLife.69457 (PMC8550772; doi:10.7554/eLife.69457)
Supplement: Supplementary file 9. [file elife-69457-supp9.xlsx]

## Sheet: S5
Primers to validate rolling circles of circRNAs
circRNA ID	gene symbol	strand	# exons	circRNA length (nt)	exon start	exon end	primer ID	forward	reverse	length of 0-circle product (nt)	length of 1-circle product (nt)
chr1|29481208|29481422	SRSF4	-	1	215	29481208	29481422	RCA_SRSF4	GGGGGGGGTTGCGTCCCTTGTGAGCATCT	GGGGGGGGGGATGGAACTGAAGTCAATGGGAG	155	370
chr16|85667520|85667738	GSE1	+	1	219	85667520	85667738	RCA_GSE1	GGGGGGGCGCCATCCTCCAGCTTTGC	GGGGGGGAGGGGGTGAGGGGGTTGA	151	370
chr9|138773479|138774924	CAMSAP1	-	2	425	138773479,138774662	138773640,138774924	RCA_CAMSAP1	GGGGGGGAGAAGGTGGTGGCCAGTGTC	GGGGGGGCAGCTCGCTGGACAGGAGAA	199	624
chr22|21288067|21288532	CRKL	+	1	466	21288067	21288532	RCA_CRKL	GGGGGGGGGGCAGCAATCACCCCTTTG	GGGGGGGGTAGGCAGGTTGGGTGCTGA	155	621
chr15|101775287|101775782	CHSY1	-	1	496	101775287	101775782	RCA_CHSY1	GGGGGGGGAGGACGTGGAGGTGGGAAG	GGGGGGGCTTCTTCTGGGGCGGGTAGG	190	686
chr1|155823067|155823597	GON4L	-	1	531	155823067	155823597	RCA_GON4L	GGGGGGGCCTGGGCCAGTTACCCAAGA	GGGGGGGGCTGTAGGGACTCTGTCACTGT	169	700
chr6|4891947|4892613	CDYL	+	1	667	4891947	4892613	RCA_CDYL	GGGGGGGGGAGCAGGCCCAGGATACAC	GGGGGGGTCGTCCTCGCTGTCATAGCC	176	843
chr11|33307959|33309057	HIPK3	+	1	1099	33307959	33309057	RCA_HIPK3	GGGGGGGGTGTTCGGCAGCCTTACAGGG	GGGGGGGGTGGAATACACAACTGCTTGGCTC	208	1307
