# Supplementary material for: circFL-seq reveals full-length circular RNAs with rolling circular reverse transcription and nanopore sequencing
Source: eLife. 2021 Oct 14;10:e69457. doi: 10.7554/eLife.69457 (PMC8550772; doi:10.7554/eLife.69457)
Supplement: Supplementary file 10. [file elife-69457-supp10.xlsx]

## Sheet: Sheet1
Primers to validate alternative splicing of circRNAs
circRNA ID	isoform ID	gene symbol	strand	AS type	primer ID	forward	reverse	product length (nt)
chr11|61133517|61135470	chr11|61133517,61134900,61135395|61133688,61134997,61135470	TMEM138	+		AS_TMEM138_iso1	ATTCTGTGCCCTGGTTCCTGGA	CGGAGACTCTGGTGTTGCT	329
	chr11|61133517,61134900|61133688,61135470			IR	AS_TMEM138_iso2	AGTTGGAGACATTAGGGCTTCT	CGGAGACTCTGGTGTTGCT	358
	chr11|61133517,61135395|61133688,61135470			ES	AS_TMEM138_iso3	ACTTTGCCCTCAGCATCTCCCT	AGCCTGGAAGACGAAGGTGTTG	190
chr19|3660964|3661999	chr19|3660964,3661371,3661869|3661081,3661524,3661999	PIP5K1C	-		AS_PIP5K1C_iso1	AGCTGGATGGCACCCTTCA	CGTGGTGGAGAGCATCTTCTT	180
	chr19|3660964,3661869|3661081,3661999			ES	AS_PIP5K1C_iso2	AGCTGGATGGCACCCTTCA	GGCAACAGAAGGAGAACAACAG	239
chr3|119219542|119222868	chr3|119219542,119222379,119222801|119219707,119222467,119222868	TIMMDC1	+		AS_TIMMDC1_iso1	TGAGCAGAGCCAGGCAGAA	CCCATACACCCAGCCAATGAT	196
	chr3|119219542,119222801|119219707,119222868			ES	AS_TIMMDC1_iso2	CTGCCACACGAGGCTTCAT	CCCATACACCCAGCCAATGAT	223
chr20|57014001|57016139	chr20|57014001,57014202,57015963|57014081,57014364,57016139	VAPB	+		AS_VAPB_iso1	GATGACACCGAAGTTAAGAAGG	AGAACTCAGAGACTTAGACACT	252
	chr20|57014001,57015963|57014081,57016139			ES	AS_VAPB_iso2	GATGACACCGAAGTTAAGAAGG	CCACAGAAGCTCTTCAGGATT	324
chr2|100065798|100081447	chr2|100065798,100067807,100078958,100081384|100065966,100067963,100079084,100081447	REV1	-		AS_REV1_iso1	TTGACCTCCATGCAACATCATTAGT	GCCACAAATCTTCCCAATGCCAA	318
	chr2|100065798,100078958,100081384|100065966,100079084,100081447			ES	AS_REV1_iso2	TGCCCTTCTACTGGATGAAGTTAAG	GCCACAAATCTTCCCAATGCCAA	364
chr10|74474869|74475660	chr10|74474869,74475520|74474984,74475660	MCU	+		AS_MCU_iso1	TCTTAGCTGCTAGAGTGTGGAG	ACGGTATCTTGCCAATCACTGT	130
	chr10|74474869,74475612|74474984,74475660			A3SS	AS_MCU_iso2	TAACAACCATGTAAGGGAGAGT	ACGGTATCTTGCCAATCACTGT	132
chr6|24416625|24418806	chr6|24416625,24418312,24418599|24416741,24418464,24418806	MRS2	+		AS_MRS2_iso1	TCTCCAATGCAGCTCGTGAG	TCCAACAGCAACTCCATCTCTT	362
	chr6|24416625,24418312,24418689|24416741,24418464,24418806			A3SS	AS_MRS2_iso2	TCATCCATGTGGTCTGTATAGA	TCCAACAGCAACTCCATCTCTT	376
chr4|186168448|186188309	chr4|186168448,186180002,186185592,186188123|186168532,186180218,186185764,186188309	SNX25	+		AS_SNX25_iso1	GCTTGAGGAACTCAGATGATG	CTACCCTTCTAGACTGAGCTG	259
	chr4|186168448,186180002,186185592,186188123|186168532,186180218,186185652,186188309			A5SS	AS_SNX25_iso2	GTGCAGTCTCTCAGCTTACGT	CTACCCTTCTAGACTGAGCTG	288
chr14|21971316|21972024	chr14|21971316,21971807|21971720,21972024	METTL3	-		AS_METTL3_iso1	CTGGGCTGTCACTACGGAAG	TGGCCTTAACATTGCCCACT	512
	chr14|21971316|21972024			IR	AS_METTL3_iso2	CTGGGCTGTCACTACGGAAG	CGGTCAGTGTCTTATTGCCCA	500
chr5|43161351|43162033	chr5|43161351,43161811|43161708,43162033	ZNF131	+		AS_ZNF131_iso1	TACATACAGAGCACAGGTTCCT	CAGATGGCAATGACTCAGTGAT	475
	chr5|43161351|43162033			IR	AS_ZNF131_iso2	TGTGAAGGACTTGTTCCATTGT	CAGATGGCAATGACTCAGTGAT	397
chr2|85595809|85598685	chr2|85595809,85596862,85598209,85598563|85595877,85596953,85598332,85598685	ELMOD3	+		AS_ELMOD3_iso1	TTCGGGAAGAAAGGGACTTGG	GTCTCTGGCTGGATGGTGTC	229
	chr2|85595809,85596862,85598209|85595877,85596953,85598685			IR	AS_ELMOD3_iso2	GTGTGTGCTGACCCTGTGA	GTCTCTGGCTGGATGGTGTC	365
