# Supplementary material for: circFL-seq reveals full-length circular RNAs with rolling circular reverse transcription and nanopore sequencing
Source: eLife. 2021 Oct 14;10:e69457. doi: 10.7554/eLife.69457 (PMC8550772; doi:10.7554/eLife.69457)
Supplement: Supplementary file 11. [file elife-69457-supp11.xlsx]

## Sheet: S7
Primers to validate the expression levels of circRNA BSJs by RT-qPCR
circRNA ID	primer ID	forward	reverse	Total RNA				RNase R treatment				circFL-seq
				HeLa (mean -ΔCT)	SKOV3 (mean -ΔCT)	HeLa-SKOV3 (-ΔΔCT)		HeLa (mean -ΔCT)	SKOV3 (mean -ΔCT)	HeLa-SKOV3 (-ΔΔCT)		HeLa log2(count+1)	SKOV3 log2(count+1)	log2foldchange
chr17|37864574|37866734	DEC_ERBB2_17|7434	GACTGCCTGTCCCTGATATCCA	TTGTTCAGCGGGTCTCCATTGT	-12.0923	-7.34667	-4.74567		-10.726	-2.804	-7.922		0	8.20457	-9.13268
chr13|64576518|64608670	DEC_LINC00355_13|1870	GGTCCTGTGCTTGCTTCCTGTTG	CACTGATGCTCAAACGCCTCCATT	-21.6335	-12.743	-8.8905		-21.156	-8.46767	-12.6883		0	5.83289	-6.70139
chr1|225140372|225156576	DEC_DNAH14_1|7276	ATCTTCAGGTAGTATCGGCTCATA	CTATAAAGGAACTGGCGGAAATC	-7.05967	-10.7387	3.679		-8.36	-11.2057	2.84567		6.55459	2.32193	4.88459
chr14|62462594|62463260	DEC_SYT16_14|9460	ATTGCGGAGGAAGAGCATCACC	CACTCTCAAAACTTCCAGCTTGCT	-19.6667	-11.5317	-8.135		-23.97	-8.74933	-15.2207		1	7.07682	-6.56212
chr5|38523521|38530768	DEC_LIFR_5|2168	ACAGCCACTGGAAATTTGAAGC	GGAGCTCGTAAAATTAGACTGACTG	-11.3633	-14.8573	3.494		-9.76433	-12.8443	3.08		7.32193	3.80735	4.17283
chr5|41794105|41807540	DEC_OXCT1_5|0540	GGTTTAGCAGATTTGGCTTCCC	CTAACTGGATGATACCTGTTGAAGA	-11.8563	-13.993	2.13667		-9.381	-12.5287	3.14767		6.06609	2.58496	4.27223
chr6|160103506|160109274	DEC_SOD2_6|0674	GGCTGTAACATCTCTCAGCATAAC	GGAGCACGCTTACTACCTTCAG	-12.0923	-7.34667	-4.74567		-16.334	-9.528	-6.806		1	8.21432	-7.63333
chr3|125032152|125050082	stable_ZNF148_3|5282	TGATTCCTCCCTCTATCAGGGAC	GCCTCACCAGGAGATCCTTGCT	-10.0217	-10.3073	0.285667		-7.76633	-7.75367	-0.0126667		8.43463	8.81378	0.0574444
chr4|144464662|144465125	stable_SMARCA5_4|6225	GAAAAACAAAAGGGAGGCTTGTGG	CTCACTTTCCTTTGAAGCAAACACA	-4.82867	-3.575	-1.25367		-8.479	-6.46667	-2.01233		8.74147	9.29921	-0.0968824
chr9|33960824|33973235	stable_UBAP2_9|2435	CTGCCACGTCCAAATCATCTTCA	TGGGAAGCTGCTCAGAATGGT	-10.5433	-9.318	-1.22533		-8.80067	-6.99833	-1.80233		6.94251	7.53138	-0.0483738
chr15|67524152|67529158	stable_AAGAB_15|5258	TGTTTGGCACCACACATAGATTGA	GTAGTGATGAAGAATGATATCCTTGG	-12.251	-11.806	-0.445		-7.79967	-6.86933	-0.930333		7.61471	8.07682	-0.0232868
chr16|69404386|69406258	stable_TERF2_16|8658	ACAAATAATGACAGCCGTGAGGAGG	AAGAACTTGGCCCATCCTGTTATCC	-8.243	-7.91467	-0.328333		-6.34933	-5.35767	-0.991667		7.62936	8.16993	0.0845173
chr2|191765290|191789319	DEC_GLS_2|9019	GACTTCTACTTCCAGATGTGTTCAG	CCACAAATCGGGACTGAATTTGG	-12.0343	-8.62367	-3.41067		-10.1777	-6.657	-3.52067		5.16993	8.24793	-2.63735
chr8|128902835|128903244	DEC_PVT1_8|3544	TCAGCTGGGCTTGAGGCCT	CGGGCGTGTGTCATTCCAGT	-10.1923	-12.6237	2.43133		-7.08833	-8.73833	1.65		8.18982	6.33985	2.31967
chr19|5641605|5641957	DEC_SAFB_19|0557	CTTCAGGAACATGCTGGCGCA	CGACACAATCTGCAACGCTTCC	-16.6773	-13.1867	-3.49067		-11.986	-9.60567	-2.38033		3.70044	7.29462	-3.23264
chr21|46548317|46554747	DEC_ADARB1_21|1747	CGCCTTGCCAGCCAGAGTGGA	GTGCGAGCGGACTGAGAGAGTA	-11.187	-13.596	2.409		-7.73233	-9.95633	2.224		6.85798	4.75489	2.61271
