# Supplementary material for: circFL-seq reveals full-length circular RNAs with rolling circular reverse transcription and nanopore sequencing
Source: eLife. 2021 Oct 14;10:e69457. doi: 10.7554/eLife.69457 (PMC8550772; doi:10.7554/eLife.69457)
Supplement: Supplementary file 12. [file elife-69457-supp12.xlsx]

## Sheet: S8
Primers to validate the expression levels of circRNA isoforms by RT-qPCR
circRNA ID	isoform ID	primer ID	forward	reverse	Total RNA				RNase R				circFL-seq
					HeLa (ratio of 2-ΔCT)	SKOV3 (ratio of 2-ΔCT)	Δratio		HeLa (ratio of 2-ΔCT)	SKOV3 (ratio of 2-ΔCT)	Δratio		HeLa (ratio of count)	SKOV3 (ratio of count)	Δratio
chr2|61749746|61761038	chr2|61749746,61752405,61753555,61760907|61749818,61752468,61753656,61761038	q_XPO1_4638_iso1	TGCTGGCATAGATTACTTCGCAC	GTGCAACTGACACAGCTAGGCT	0.141473	0.504159	-0.362685		0.186496	0.474952	-0.288456		0.246626	0.569413	-0.322787
	chr2|61749746,61753555,61760907|61749818,61753656,61761038	q_XPO1_4638_iso2	TGCTGGCATAGATTACTTCGCAC	CTCAGAATATGAATACGAAATACTATGG	0.858527	0.495841	0.362685		0.813504	0.525048	0.288456		0.753374	0.430587	0.322787
chr2|100065798|100081447	chr2|100065798,100067807,100078958,100081384|100065966,100067963,100079084,100081447	q_REV1_9847_iso1	CTCATGGTGGAGCTTCTTTCCA	CAGCTAGTAGACGGATCCTTCC	0.49974	0.59194	-0.0921994		0.471496	0.748181	-0.276685		0.479971	0.828207	-0.348236
	chr2|100065798,100078958,100081384|100065966,100079084,100081447	q_REV1_9847_iso2	CTCATGGTGGAGCTTCTTTCCA	GTTAATGGATACACAGATCCTTCC	0.50026	0.40806	0.0921994		0.528504	0.251819	0.276685		0.520029	0.171793	0.348236
chr3|145838899|145842016	chr3|145838899,145839758,145841052,145841925|145839035,145839820,145841112,145842016	q_PLOD2_9916_iso1	GCTACAGTTATGACTAATAATTTATCATTCAG	GAAATGAAGAGAAAAGGTCCTTGG	0.95712	0.524702	0.432418		0.960257	0.442493	0.517764		0.830463	0.456766	0.373697
	chr3|145838899,145841052,145841925|145839035,145841112,145842016	q_PLOD2_9916_iso2	GCTACAGTTATGACTAATAATTTATCATTCAG	AACAAGGAGATACCTAGGTCCTTGG	0.0428797	0.475298	-0.432418		0.0397425	0.557507	-0.517764		0.136523	0.509013	-0.372489
chr15|93540187|93541851	chr15|93540187,93540483,93541379,93541729|93540325,93540633,93541491,93541851	q_CHD2_8751_iso1	TTCCCTGCTCCTGGAAGGA	CCCTGGTCCTTTTCCTCTTC	0.475298	0.757891	-0.282593		0.388902	0.754526	-0.365624		0.171652	0.572641	-0.400989
	chr15|93540187,93540483,93541729|93540325,93540633,93541851	q_CHD2_8751_iso2	GAGCTTAAATTAACTGACAAAATTCTGC	CCCTGGTCCTTTTCCTCTTC	0.524702	0.242109	0.282593		0.611098	0.245474	0.365624		0.828348	0.427359	0.400989
chr19|3660964|3661999	chr19|3660964,3661371,3661869|3661081,3661524,3661999	q_PIP5K1C_6499_iso1	GGAGGAGGTGGTCAAGTAATC	CCTTTCGGACATGACCAGTGTT	0.344827	0.662185	-0.317357		0.301174	0.579212	-0.278038		0.306006	0.478142	-0.172136
	chr19|3660964,3661869|3661081,3661999	q_PIP5K1C_6499_iso2	GGAGGAGGTGGTCAAGTAATC	ATCTTCTTCCCCAGCGAAGG	0.655173	0.337815	0.317357		0.698826	0.420788	0.278038		0.693994	0.521858	0.172136
chr14|97299804|97327072	chr14|97299804,97304099,97312432,97313594,97319168,97319411,97321561,97322467,97322865,97326894|97299968,97304154,97312501,97313681,97319276,97319503,97321693,97322587,97322923,97327072	q_VRK1_0472_iso1	CCTTGGGAGGATAATTTGAAAGATC	CACGAGGCATTTTCACTTTGTTATTG	0.593613	0.782412	-0.1888		0.586907	0.742921	-0.156014		0.440387	0.680435	-0.240047
	chr14|97299804,97304099,97312432,97313594,97319168,97319411,97321561,97322865,97326894|97299968,97304154,97312501,97313681,97319276,97319503,97321693,97322923,97327072	q_VRK1_0472_iso2	CACACAATGGCGTGGATACAG	CACGAGGCATTTTCACTTTGTTATTG	0.406387	0.217588	0.1888		0.413093	0.257079	0.156014		0.559613	0.319565	0.240047
chr5|179688684|179707608	chr5|179688684,179691781,179696280,179706796,179707440|179688822,179691839,179696409,179707036,179707608	q_MAPK9_8408_iso1	TGGCAAGGCACTGCAATGATG	GCTGGTATAATTCATAGAGGATCTG	0.897758	0.860729	0.0370285		0.850779	0.819218	0.0315606		0.76125	0.842914	-0.0816639
	chr5|179688684,179691781,179696280,179707440|179688822,179691839,179696409,179707608	q_MAPK9_8408_iso2	GAACTGTATCAAATGCAGCACAAAC	GCTGGTATAATTCATAGAGGATCTG	0.102242	0.139271	-0.0370285		0.149221	0.180782	-0.0315606		0.23875	0.157086	0.0816639
chr9|33953283|33963789	chr9|33953283,33956077,33960824,33963724|33953472,33956144,33960876,33963789	q_UBAP2_8389_iso1	GAGTATTTGATGCCAGTTCAGGC	GAGAATCACATCTTACCTGGGC	0.711364	0.702605	0.00875854		0.740442	0.706979	0.033463		0.636937	0.69881	-0.0618726
	chr9|33953283,33960824,33963724|33953472,33960876,33963789	q_UBAP2_8389_iso2	GAGTATTTGATGCCAGTTCAGGC	GAAGACTGGACTGAAGATCATTGATC	0.288636	0.297395	-0.00875854		0.259558	0.293021	-0.033463		0.363063	0.30119	0.0618726
chr12|116668338|116675510	chr12|116668338,116669864,116674626,116675273|116668427,116669961,116674695,116675510	q_MED13L_3810_iso1	TCCCGTGAGTTCAGCCTGAA	GATCTGTTTTCTGACAGTGACCACG	0.684089	0.827121	-0.143032		0.521417	0.746086	-0.224669		0.391125	0.566637	-0.175512
	chr12|116668338,116674626,116675273|116668427,116674695,116675510	q_MED13L_3810_iso2	TCCCGTGAGTTCAGCCTGAA	CTGATATCTGGAAACTGAATTAATTGGTA	0.315911	0.172879	0.143032		0.478583	0.253914	0.224669		0.494324	0.308998	0.185326
