# Supplementary material for: circFL-seq reveals full-length circular RNAs with rolling circular reverse transcription and nanopore sequencing
Source: eLife. 2021 Oct 14;10:e69457. doi: 10.7554/eLife.69457 (PMC8550772; doi:10.7554/eLife.69457)
Supplement: Supplementary file 13. [file elife-69457-supp13.xlsx]

## Sheet: S9
Primers to validate full-length sequence of f-circ
circRNA ID	isoform ID	gene symbol 1	gene symbol 2	strand 1	strand 2	circRNA length (nt)	primer ID	forward	reverse	length of 0-circle product (nt)	length of 1-circle product (nt)
chr20|14665489|14665605|chr10|104018686|104019873	chr20|14665489|14665605|chr10|104018686,104019807|104018791,104019873	MACROD2	GBF1	+	+	290	RCA_f_M_G_290	GGGGGGGGGTTGCCAAGATGGTGGATAAGAA	GGGGGGGGCAGCCATTCAGGTTACGACAT	255	545
chr20|14665489|14665605|chr10|104018686|104044827	chr20|14665489|14665605|chr10|104018686,104019807,104044710|104018791,104019873,104044827					408	RCA_f_M_G_408	GGGGGGGGTGGATCTTCTGACATGCTTCTC	GGGGGGGGCAGCCATTCAGGTTACGACAT	143	551
chr3|64049163|64053837|chr20|40818308|40818468	chr3|64049163,64053535|64049569,64053837|chr20|40818308|40818468	PRICKLE2-AS1	PTPRT-AS1	+	+	871	RCA_f_P_P_871	GGGGGGGAACTAGAACGGTCGTGTCCCTA	GGGGGGGGGTTGTTAGCTGTTTCGCATCTGC	422	1293
