# Supplementary material for: circFL-seq reveals full-length circular RNAs with rolling circular reverse transcription and nanopore sequencing
Source: eLife. 2021 Oct 14;10:e69457. doi: 10.7554/eLife.69457 (PMC8550772; doi:10.7554/eLife.69457)
Supplement: Supplementary file 14. [file elife-69457-supp14.xlsx]

## Sheet: S10
Primers to validate the expression levels of f-circ junctions by RT-qPCR
fusion gene	junction ID	primer ID	forward	reverse
GBF1/ MACROD2	E2-E4	q_f_M_G_E2_E4	GGTTTTAAACAGTATAACAGTGGATGG	GCAGGAAGGTCATAGCCACATG
	E3-E4	q_f_M_G_E3_E4	CTGGGCCAAATAAGTGGATGG	GCAGGAAGGTCATAGCCACATG
	E4-E1	q_f_M_G_E4_E1	GACCTTCCTGCAAAATGTTTGCC	CAGTGGTGTATGGGTGCTC
PRICKLE2-AS1/PTPRT-AS1	E2-E3	q_f_P_P_E2_E3	GGATCAATAACATCTAAGGTGTGG	GGACAATGCAAACTGAAATTGGC
	E3-E1	q_f_P_P_E3_E1	CTGGATGGTATGTCTTAGGGTAC	GAGTTGCAGAGAGTTTTCCCAAGA
